# Supplementary material for: The mammalian target of rapamycin (mTOR) kinase mediates haloperidol-induced cataleptic behavior
Source: PubMed Central journal article supplement (PMC7532208; doi:10.1038/s41398-020-01014-x), 2020-10-02
Supplement: 41398_2020_1014_MOESM1_ESM.pdf [file 41398_2020_1014_MOESM1_ESM.pdf]

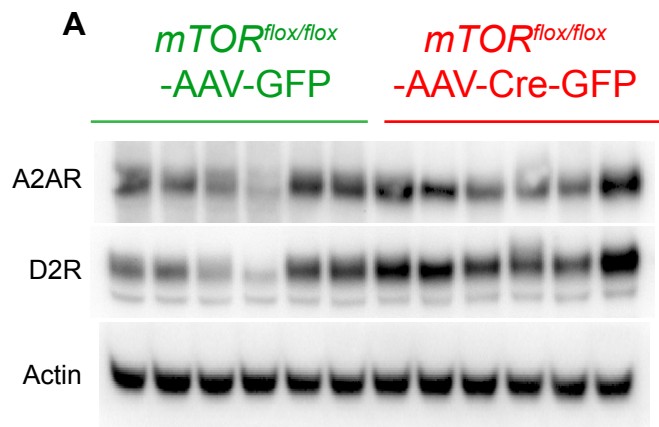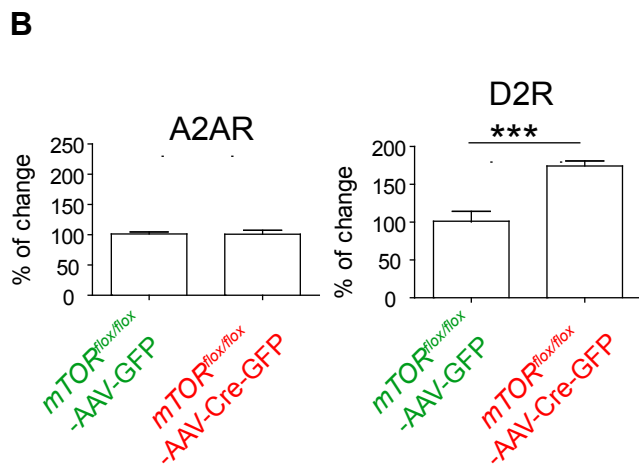

Supplementary Figure 1
